# Supplementary material for: An effective pathway to design and synthesize UV birefringent crystalsviarational assembly of π-conjugated [CO3]2−and [NO3]−triangles
Source: Royal Society of Chemistry journal article supplement (doi:10.1039/d2tc05374h), 2023-01-01
Supplement: d2tc05374h1.pdf [file d2tc05374h1.pdf]

## Supporting Information

### **An Effective Pathway to Design and Synthesize UV Birefringent Crystals via Rational Assemble of $\pi$ -conjugated $[\text{CO}_3]^{2-}$ and $[\text{NO}_3]^-$ Triangles**

Zhaowei Hu,<sup>a</sup> Lili Liu, <sup>\*a</sup> Ruixin Zhang,<sup>b</sup> Qun Jing,<sup>b</sup> Huan Wang,<sup>a</sup> Jindan Tian,<sup>a</sup> Jiayue Xu,<sup>\*a</sup> and P. Shiv Halasyamani<sup>\*c</sup>

a. Institute of Crystal Growth, School of Materials Science and Engineering, Shanghai Institute of Technology, Shanghai 201418, China.

b. School of Physical Science and Technology, Xinjiang University, Urumqi 830046, China.

c. Department of Chemistry, University of Houston, 112 Fleming Building, Houston, Texas 77204, USA.

\*E-mail: liulili@sit.edu.cn; xujiayue@sit.edu; psh@uh.edu

## Table of Contents

|                                                                                                                                                                                                                                                                      |            |
|----------------------------------------------------------------------------------------------------------------------------------------------------------------------------------------------------------------------------------------------------------------------|------------|
| <b>Table S1.</b> Crystal data and structure refinement for $\text{Na}_3\text{Rb}_6(\text{CO}_3)_3(\text{NO}_3)_2\text{Br}\cdot 6\text{H}_2\text{O}$ and $\text{Na}_3\text{Rb}_6(\text{CO}_3)_3(\text{NO}_3)_2\text{Cl}\cdot 6\text{H}_2\text{O}$ .                   | <b>S3</b>  |
| <b>Table S2.</b> Atomic coordinates ( $\times 10^4$ ), equivalent isotropic displacement parameters ( $\text{\AA}^2 \times 10^3$ ) and bond valence sums (BVS) for $\text{Na}_3\text{Rb}_6(\text{CO}_3)_3(\text{NO}_3)_2\text{Br}\cdot 6\text{H}_2\text{O}$ .        | <b>S4</b>  |
| <b>Table S3.</b> Atomic coordinates ( $\times 10^4$ ), equivalent isotropic displacement parameters ( $\text{\AA}^2 \times 10^3$ ) and bond valence sums (BVS) for $\text{Na}_3\text{Rb}_6(\text{CO}_3)_3(\text{NO}_3)_2\text{Cl}\cdot 6\text{H}_2\text{O}$ .        | <b>S4</b>  |
| <b>Table S4.</b> Bond lengths [ $\text{\AA}$ ] and angles [ $^\circ$ ] for $\text{Na}_3\text{Rb}_6(\text{CO}_3)_3(\text{NO}_3)_2\text{Br}\cdot 6\text{H}_2\text{O}$ .                                                                                                | <b>S5</b>  |
| <b>Table S5.</b> Bond lengths [ $\text{\AA}$ ] and angles [ $^\circ$ ] for $\text{Na}_3\text{Rb}_6(\text{CO}_3)_3(\text{NO}_3)_2\text{Cl}\cdot 6\text{H}_2\text{O}$ .                                                                                                | <b>S6</b>  |
| <b>Table S6.</b> Hydrogen coordinates ( $\times 10^4$ ) and isotropic displacement parameters ( $\text{\AA}^2 \times 10^3$ ) for $\text{Na}_3\text{Rb}_6(\text{CO}_3)_3(\text{NO}_3)_2\text{Br}\cdot 6\text{H}_2\text{O}$ .                                          | <b>S7</b>  |
| <b>Table S7.</b> Hydrogen coordinates ( $\times 10^4$ ) and isotropic displacement parameters ( $\text{\AA}^2 \times 10^3$ ) for $\text{Na}_3\text{Rb}_6(\text{CO}_3)_3(\text{NO}_3)_2\text{Cl}\cdot 6\text{H}_2\text{O}$ .                                          | <b>S7</b>  |
| <b>Table S8.</b> The refractive indices and birefringence values of $\text{Na}_3\text{Rb}_6(\text{CO}_3)_3(\text{NO}_3)_2\text{X}\cdot 6\text{H}_2\text{O}$ (X=Br and Cl).                                                                                           | <b>S7</b>  |
| <b>Table S9.</b> Birefringences and band gaps of selected carbonates and nitrates.                                                                                                                                                                                   | <b>S8</b>  |
| <b>Figure S1.</b> The photos of (a) $\text{Na}_3\text{Rb}_6(\text{CO}_3)_3(\text{NO}_3)_2\text{Br}\cdot 6\text{H}_2\text{O}$ and (b) $\text{Na}_3\text{Rb}_6(\text{CO}_3)_3(\text{NO}_3)_2\text{Cl}\cdot 6\text{H}_2\text{O}$ crystals.                              | <b>S9</b>  |
| <b>Figure S2.</b> Experimental and theoretical PXRD patterns of (a) $\text{Na}_3\text{Rb}_6(\text{CO}_3)_3(\text{NO}_3)_2\text{Br}\cdot 6\text{H}_2\text{O}$ and (b) $\text{Na}_3\text{Rb}_6(\text{CO}_3)_3(\text{NO}_3)_2\text{Cl}\cdot 6\text{H}_2\text{O}$ .      | <b>S9</b>  |
| <b>Figure S3.</b> The unit cell of $\text{Na}_3\text{Rb}_6(\text{CO}_3)_3(\text{NO}_3)_2\text{Br}\cdot 6\text{H}_2\text{O}$ .                                                                                                                                        | <b>S9</b>  |
| <b>Figure S4.</b> The asymmetric unit of $\text{Na}_3\text{Rb}_6(\text{CO}_3)_3(\text{NO}_3)_2\text{Br}\cdot 6\text{H}_2\text{O}$ .                                                                                                                                  | <b>S10</b> |
| <b>Figure S5.</b> Coordination environments of cations in $\text{Na}_3\text{Rb}_6(\text{CO}_3)_3(\text{NO}_3)_2\text{Br}\cdot 6\text{H}_2\text{O}$ .                                                                                                                 | <b>S10</b> |
| <b>Figure S6.</b> A $[\text{BrRb}_6]^{5+}$ polyhedron in $\text{Na}_3\text{Rb}_6(\text{CO}_3)_3(\text{NO}_3)_2\text{Br}\cdot 6\text{H}_2\text{O}$ .                                                                                                                  | <b>S10</b> |
| <b>Figure S7.</b> TG-DSC curves of (a) $\text{Na}_3\text{Rb}_6(\text{CO}_3)_3(\text{NO}_3)_2\text{Br}\cdot 6\text{H}_2\text{O}$ and (b) $\text{Na}_3\text{Rb}_6(\text{CO}_3)_3(\text{NO}_3)_2\text{Cl}\cdot 6\text{H}_2\text{O}$ .                                   | <b>S11</b> |
| <b>Figure S8.</b> PXRD patterns of residues after decomposition for (a) $\text{Na}_3\text{Rb}_6(\text{CO}_3)_3(\text{NO}_3)_2\text{Br}\cdot 6\text{H}_2\text{O}$ and (b) $\text{Na}_3\text{Rb}_6(\text{CO}_3)_3(\text{NO}_3)_2\text{Cl}\cdot 6\text{H}_2\text{O}$ .  | <b>S11</b> |
| <b>Figure S9.</b> IR spectra of (a) $\text{Na}_3\text{Rb}_6(\text{CO}_3)_3(\text{NO}_3)_2\text{Br}\cdot 6\text{H}_2\text{O}$ and (b) $\text{Na}_3\text{Rb}_6(\text{CO}_3)_3(\text{NO}_3)_2\text{Cl}\cdot 6\text{H}_2\text{O}$ .                                      | <b>S11</b> |
| <b>Figure S10.</b> The calculated band gaps and PDOS plots for (a, b) $\text{Na}_3\text{Rb}_6(\text{CO}_3)_3(\text{NO}_3)_2\text{Br}\cdot 6\text{H}_2\text{O}$ and (c, d) $\text{Na}_3\text{Rb}_6(\text{CO}_3)_3(\text{NO}_3)_2\text{Cl}\cdot 6\text{H}_2\text{O}$ . | <b>S12</b> |
| <b>Figure S11.</b> The selected crystal before and after compensatory rotation for birefringence test.                                                                                                                                                               | <b>S12</b> |
| <b>References</b>                                                                                                                                                                                                                                                    | <b>S13</b> |

**Table S1.** Crystal data and structure refinement for Na<sub>3</sub>Rb<sub>6</sub>(CO<sub>3</sub>)<sub>3</sub>(NO<sub>3</sub>)<sub>2</sub>Br·6H<sub>2</sub>O and Na<sub>3</sub>Rb<sub>6</sub>(CO<sub>3</sub>)<sub>3</sub>(NO<sub>3</sub>)<sub>2</sub>Cl·6H<sub>2</sub>O

| Formula                                                    | Na <sub>3</sub> Rb <sub>6</sub> (CO <sub>3</sub> ) <sub>3</sub> (NO <sub>3</sub> ) <sub>2</sub> Br·6H <sub>2</sub> O | Na <sub>3</sub> Rb <sub>6</sub> (CO <sub>3</sub> ) <sub>3</sub> (NO <sub>3</sub> ) <sub>2</sub> Cl·6H <sub>2</sub> O |
|------------------------------------------------------------|----------------------------------------------------------------------------------------------------------------------|----------------------------------------------------------------------------------------------------------------------|
| Formula weight                                             | 1073.85                                                                                                              | 1029.39                                                                                                              |
| Crystal system                                             |                                                                                                                      | Hexagonal                                                                                                            |
| Space group                                                |                                                                                                                      | <i>P6<sub>3</sub>/mcm</i>                                                                                            |
| Temperature/K                                              |                                                                                                                      | 293(2) K                                                                                                             |
| a(Å)                                                       | 9.6086(4)                                                                                                            | 9.5886(2)                                                                                                            |
| b(Å)                                                       | 9.6086(4)                                                                                                            | 9.5886(2)                                                                                                            |
| c(Å)                                                       | 15.8641(15)                                                                                                          | 15.8392(4)                                                                                                           |
| v/Å <sup>3</sup>                                           | 1268.43(14)                                                                                                          | 1261.17(6)                                                                                                           |
| Z                                                          | 2                                                                                                                    | 2                                                                                                                    |
| ρ(calcd)Mg/m <sup>3</sup>                                  | 2.812                                                                                                                | 2.711                                                                                                                |
| μ/mm <sup>-1</sup>                                         | 13.199                                                                                                               | 11.797                                                                                                               |
| F(000)                                                     | 1004                                                                                                                 | 968                                                                                                                  |
| λ (Å)                                                      | 0.71073                                                                                                              | 0.71073                                                                                                              |
| Completeness to theta = 25.242°                            | 99.7 %                                                                                                               | 100.0 %                                                                                                              |
| No. of reflections                                         | 603                                                                                                                  | 560                                                                                                                  |
| No. of parameters                                          | 40                                                                                                                   | 40                                                                                                                   |
| Δρ <sub>max</sub>                                          | 0.553                                                                                                                | 0.299                                                                                                                |
| Δρ <sub>min</sub>                                          | -0.562                                                                                                               | -0.258                                                                                                               |
| R <sub>1</sub> /wR <sub>2</sub> (I > 2σ(I)) <sup>[a]</sup> | 0.0327/ 0.0691                                                                                                       | 0.0199/0.0357                                                                                                        |
| R <sub>1</sub> /wR <sub>1</sub> (all data) <sup>[a]</sup>  | 0.0344/ 0.0696                                                                                                       | 0.0313/ 0.0386                                                                                                       |

<sup>[a]</sup>R<sub>1</sub>=Σ||F<sub>o</sub>|-|F<sub>c</sub>||/Σ|F<sub>o</sub>| and wR<sub>2</sub>=[Σw(F<sub>o</sub><sup>2</sup>-F<sub>c</sub><sup>2</sup>)<sup>2</sup>/ΣwF<sub>o</sub><sup>4</sup>]<sup>1/2</sup> for F<sub>o</sub><sup>2</sup>>2σ(F<sub>o</sub><sup>2</sup>)

**Table S2.** Atomic coordinates ( $\times 10^4$ ), equivalent isotropic displacement parameters ( $\text{\AA}^2 \times 10^3$ ) and bond valence sums (BVS) for  $\text{Na}_3\text{Rb}_6(\text{CO}_3)_3(\text{NO}_3)_2\text{Br}\cdot 6\text{H}_2\text{O}$ .  $U_{\text{eq}}$  is defined as one third of the trace of the orthogonalized  $U_{ij}$  tensor.

| atom  | x       | y       | z       | $U_{\text{eq}} \text{\AA}^2$ | BVS    |
|-------|---------|---------|---------|------------------------------|--------|
| Rb(1) | 2858(1) | 2858(1) | 1202(1) | 31(1)                        | +1.130 |
| Na(1) | 3776(4) | 0       | 2500    | 34(1)                        | +1.178 |
| N(1)  | 6667    | 3333    | 2500    | 21(2)                        | +4.817 |
| C(1)  | 0       | 0       | 2500    | 18(2)                        | +4.282 |
| C(2)  | 6667    | 3333    | 0       | 21(2)                        | +3.992 |
| O(1)  | 6036(4) | 6036(4) | 1052(2) | 30(1)                        | -0.463 |
| O(2)  | 1333(4) | 0(4)    | 2500(2) | 33(1)                        | -2.007 |
| O(3)  | 5122(5) | 2561(2) | 0       | 31(1)                        | -1.592 |
| O(4)  | 5252(5) | 3076(5) | 2500    | 32(1)                        | -2.105 |
| Br(1) | 0       | 0       | 0       | 31(1)                        | -1.307 |

**Table S3.** Atomic coordinates ( $\times 10^4$ ), equivalent isotropic displacement parameters ( $\text{\AA}^2 \times 10^3$ ) and bond valence sums (BVS) for  $\text{Na}_3\text{Rb}_6(\text{CO}_3)_3(\text{NO}_3)_2\text{Cl}\cdot 6\text{H}_2\text{O}$ .  $U_{\text{eq}}$  is defined as one third of the trace of the orthogonalized  $U_{ij}$  tensor.

| atom  | x       | y       | z       | $U_{\text{eq}} \text{\AA}^2$ | BVS    |
|-------|---------|---------|---------|------------------------------|--------|
| Rb(1) | 2741(1) | 2741(1) | 1193(1) | 25(1)                        | +1.089 |
| Na(1) | 3703(2) | 0       | 2500    | 22(1)                        | +1.214 |
| N(1)  | 6667    | 3333    | 2500    | 21(1)                        | +4.960 |
| C(1)  | 0       | 0       | 2500    | 19(2)                        | +3.984 |
| C(2)  | 6667    | 3333    | 0       | 22(1)                        | +3.974 |
| O(1)  | 5999(3) | 5999(3) | 1052(1) | 32(1)                        | -0.439 |
| O(2)  | 1340(3) | 0       | 2500    | 25(1)                        | -2.055 |
| O(3)  | 5118(3) | 2559(1) | 0       | 30(1)                        | -1.575 |
| O(4)  | 5264(3) | 3093(3) | 2500    | 32(1)                        | -2.089 |
| Cl(1) | 0       | 0       | 0       | 27(1)                        | -1.233 |

**Table S4.** Bond lengths [Å] and angles [°] for Na<sub>3</sub>Rb<sub>6</sub>(CO<sub>3</sub>)<sub>3</sub>(NO<sub>3</sub>)<sub>2</sub>Br·6H<sub>2</sub>O.

|               |            |                |            |
|---------------|------------|----------------|------------|
| Rb(1)-O(3)#1  | 3.012(2)   | N(1)-Na(1)#6   | 3.0127(14) |
| Rb(1)-O(3)    | 3.012(2)   | C(1)-O(2)#13   | 1.281(2)   |
| Rb(1)-O(4)    | 3.015(3)   | C(1)-O(2)#3    | 1.281(2)   |
| Rb(1)-O(4)#2  | 3.015(3)   | C(1)-O(2)      | 1.281(2)   |
| Rb(1)-O(1)    | 3.062(4)   | C(1)-Rb(1)#12  | 3.4324(6)  |
| Rb(1)-O(2)#3  | 3.147(4)   | C(1)-Rb(1)#11  | 3.4324(6)  |
| Rb(1)-O(2)    | 3.147(4)   | C(1)-Rb(1)#3   | 3.4324(6)  |
| Rb(1)-Br(1)   | 3.3435(6)  | C(1)-Rb(1)#13  | 3.4324(6)  |
| Rb(1)-O(1)#4  | 3.413(3)   | C(1)-Rb(1)#14  | 3.4324(6)  |
| Rb(1)-O(1)#5  | 3.413(3)   | C(2)-O(3)#4    | 1.285(4)   |
| Rb(1)-Na(1)#6 | 3.834(3)   | C(2)-O(3)#15   | 1.285(4)   |
| Rb(1)-Na(1)#3 | 3.871(2)   | C(2)-O(3)      | 1.285(4)   |
| Rb(1)-H(1)    | 3.2294     | O(1)-Na(1)#6   | 2.303(4)   |
| Na(1)-O(1)#7  | 2.303(4)   | O(1)-Rb(1)#16  | 3.413(3)   |
| Na(1)-O(1)#4  | 2.303(4)   | O(1)-Rb(1)#15  | 3.413(3)   |
| Na(1)-O(2)    | 2.347(4)   | O(1)-H(1)      | 0.8918     |
| Na(1)-O(4)#8  | 2.560(4)   | O(2)-Rb(1)#12  | 3.147(4)   |
| Na(1)-O(4)    | 2.560(4)   | O(2)-Rb(1)#11  | 3.147(4)   |
| Na(1)-O(4)#4  | 2.683(5)   | O(2)-Rb(1)#13  | 3.147(4)   |
| Na(1)-O(4)#9  | 2.683(5)   | O(3)-Rb(1)#17  | 3.012(2)   |
| Na(1)-N(1)#10 | 3.0127(14) | O(4)-Na(1)#6   | 2.683(5)   |
| Na(1)-Rb(1)#7 | 3.834(3)   | O(4)-Rb(1)#12  | 3.015(3)   |
| Na(1)-Rb(1)#4 | 3.834(3)   | Br(1)-Rb(1)#18 | 3.3435(6)  |
| Na(1)Rb(1)#11 | 3.871(2)   | Br(1)-Rb(1)#1  | 3.3435(6)  |
| Na(1)Rb(1)#12 | 3.871(2)   | Br(1)-Rb(1)#3  | 3.3435(6)  |
| N(1)-O(4)#4   | 1.254(4)   | Br(1)-Rb(1)#17 | 3.3435(6)  |
| N(1)-O(4)#6   | 1.254(4)   | Br(1)-Rb(1)#11 | 3.3435(6)  |
| N(1)-O(4)     | 1.254(4)   |                |            |

Symmetry transformations used to generate equivalent atoms:

#1 x-y,x,-z #2 y,x,z #3 -y,x-y,z  
#4 -y+1,x-y,z #5 -x+y,-x+1,z #6 -x+y+1,-x+1,-z+1/2  
#7 -y+1,x-y,-z+1/2 #8 x-y,-y,-z+1/2  
#9 -x+1,-x+y,z #10 y,x-1,z #11 -x+y,-x,z  
#12 x,y,-z+1/2 #13 -x+y,-x,-z+1/2  
#14 -y,x-y,-z+1/2 #15 -x+y+1,-x+1,z  
#16 -y+1,x-y+1,z #17 y,-x+y,-z #18 -x,-y,-z

**Table S5.** Bond lengths [Å] and angles [°] for Na<sub>3</sub>Rb<sub>6</sub>(CO<sub>3</sub>)<sub>3</sub>(NO<sub>3</sub>)<sub>2</sub>Cl·6H<sub>2</sub>O.

|                |            |                |            |
|----------------|------------|----------------|------------|
| Rb(1)-O(3)     | 3.0322(16) | N(1)-Na(1)#6   | 3.0344(7)  |
| Rb(1)-O(3)#1   | 3.0322(15) | C(1)-O(2)#13   | 1.285(3)   |
| Rb(1)-O(4)#2   | 3.0717(18) | C(1)-O(2)#3    | 1.285(3)   |
| Rb(1)-O(4)     | 3.0718(18) | C(1)-O(2)      | 1.285(3)   |
| Rb(1)-O(2)     | 3.0770(3)  | C(1)-Rb(1)#12  | 3.3458(3)  |
| Rb(1)-O(2)#3   | 3.0770(3)  | C(1)-Rb(1)#11  | 3.3458(3)  |
| Rb(1)-O(1)     | 3.132(2)   | C(1)-Rb(1)#3   | 3.3458(3)  |
| Rb(1)-Cl(1)    | 3.2373(3)  | C(1)-Rb(1)#13  | 3.3458(3)  |
| Rb(1)-O(1)#4   | 3.4050(18) | C(1)-Rb(1)#14  | 3.3458(3)  |
| Rb(1)-O(1)#5   | 3.4050(18) | C(2)-O(3)#5    | 1.286(2)   |
| Rb(1)-Na(1)#3  | 3.8039(11) | C(2)-O(3)#15   | 1.286(2)   |
| Rb(1)-Na(1)#6  | 3.9884(16) | C(2)-O(3)      | 1.286(2)   |
| Na(1)-O(2)     | 2.266(4)   | O(1)-Na(1)#6   | 2.312(2)   |
| Na(1)-O(1)#7   | 2.312(2)   | O(1)-Rb(1)#16  | 3.4050(18) |
| Na(1)-O(1)#5   | 2.312(2)   | O(1)-Rb(1)#15  | 3.4050(18) |
| Na(1)-O(4)     | 2.569(2)   | O(1)-H(1)      | 0.8664     |
| Na(1)-O(4)#8   | 2.569(2)   | O(2)-Rb(1)#11  | 3.0770(3)  |
| Na(1)-O(4)#5   | 2.715(3)   | O(2)-Rb(1)#12  | 3.0770(3)  |
| Na(1)-O(4)#9   | 2.715(3)   | O(2)-Rb(1)#13  | 3.0770(3)  |
| Na(1)-N(1)#10  | 3.0345(7)  | O(3)-Rb(1)#17  | 3.0322(15) |
| Na(1)-Rb(1)#11 | 3.8039(11) | O(4)-Na(1)#6   | 2.715(3)   |
| Na(1)-Rb(1)#12 | 3.8039(11) | O(4)-Rb(1)#12  | 3.0717(18) |
| Na(1)-Rb(1)#13 | 3.8039(11) | Cl(1)-Rb(1)#18 | 3.2373(3)  |
| Na(1)-Rb(1)#7  | 3.9884(16) | Cl(1)-Rb(1)#1  | 3.2373(3)  |
| N(1)-O(4)#5    | 1.246(2)   | Cl(1)-Rb(1)#3  | 3.2373(3)  |
| N(1)-O(4)      | 1.246(2)   | Cl(1)-Rb(1)#17 | 3.2373(3)  |
| N(1)-O(4)#6    | 1.246(2)   | Cl(1)-Rb(1)#11 | 3.2373(3)  |
| N(1)-Na(1)#5   | 3.0344(7)  |                |            |

Symmetry transformations used to generate equivalent atoms:

#1 x-y,x,-z #2 y,x,z #3 -y,x-y,z #4 -x+y,-x+1,z  
#5 -y+1,x-y,z #6 -x+y+1,-x+1,-z+1/2 #7 -y+1,x-y,-z+1/2  
#8 x-y,-y,-z+1/2 #9 -x+1,-x+y,z #10 y,x-1,z  
#11 -x+y,-x,z #12 x,y,-z+1/2 #13 -x+y,-x,-z+1/2  
#14 -y,x-y,-z+1/2 #15 -x+y+1,-x+1,z #16 -y+1,x-y+1,z  
#17 y,-x+y,-z #18 -x,-y,-z

**Table S6.** Hydrogen coordinates ( $\times 10^4$ ) and isotropic displacement parameters ( $\text{\AA}^2 \times 10^3$ ) for  $\text{Na}_3\text{Rb}_6(\text{CO}_3)_3(\text{NO}_3)_2\text{Br}\cdot 6\text{H}_2\text{O}$ .

|      | x    | y    | z   | $U_{\text{eq}}$ |
|------|------|------|-----|-----------------|
| H(1) | 6456 | 5613 | 705 | 45              |

**Table S7.** Hydrogen coordinates ( $\times 10^4$ ) and isotropic displacement parameters ( $\text{\AA}^2 \times 10^3$ ) for  $\text{Na}_3\text{Rb}_6(\text{CO}_3)_3(\text{NO}_3)_2\text{Cl}\cdot 6\text{H}_2\text{O}$ .

|      | x    | y    | z   | $U_{\text{eq}}$ |
|------|------|------|-----|-----------------|
| H(1) | 6419 | 5613 | 704 | 48              |

**Table S8.** The refractive indices and birefringence values of  $\text{Na}_3\text{Rb}_6(\text{CO}_3)_3(\text{NO}_3)_2\text{X}\cdot 6\text{H}_2\text{O}$  (X=Br and Cl).

| Compound                                                                                 |               | $N_o$ | $N_e$ | $\Delta n$ |
|------------------------------------------------------------------------------------------|---------------|-------|-------|------------|
| $\text{Na}_3\text{Rb}_6(\text{CO}_3)_3(\text{NO}_3)_2\text{Br}\cdot 6\text{H}_2\text{O}$ | Origin        | 1.650 | 1.485 | 0.165      |
|                                                                                          | $\text{CO}_3$ | 1.267 | 1.178 | 0.089      |
|                                                                                          | $\text{NO}_3$ | 1.223 | 1.103 | 0.121      |
| $\text{Na}_3\text{Rb}_6(\text{CO}_3)_3(\text{NO}_3)_2\text{Cl}\cdot 6\text{H}_2\text{O}$ | Origin        | 1.642 | 1.476 | 0.166      |
|                                                                                          | $\text{CO}_3$ | 1.266 | 1.176 | 0.090      |
|                                                                                          | $\text{NO}_3$ | 1.223 | 1.102 | 0.121      |

**Table S9.** Birefringences and band gaps of selected carbonates and nitrates.

|    | Compound                                                                                                             | Birefringence | Band gap (eV) | Reference |
|----|----------------------------------------------------------------------------------------------------------------------|---------------|---------------|-----------|
| 1  | Pb <sub>6</sub> O <sub>4</sub> (BO <sub>3</sub> )(NO <sub>3</sub> )                                                  | 0.276         | 3.3           | 1         |
| 2  | KPb <sub>2</sub> (CO <sub>3</sub> ) <sub>2</sub> F                                                                   | 0.274         | 3.9           | 2         |
| 3  | In(IO <sub>3</sub> ) <sub>2</sub> (NO <sub>3</sub> )                                                                 | 0.269         | 4.08          | 3         |
| 4  | La(OH) <sub>2</sub> NO <sub>3</sub>                                                                                  | 0.203         | 4.76          | 4         |
| 5  | CsPbCO <sub>3</sub> F                                                                                                | 0.183         | 4.15          | 5         |
| 6  | Pb <sub>2</sub> (BO <sub>3</sub> )(NO <sub>3</sub> )                                                                 | 0.174         | 3.65          | 6         |
| 7  | NaZnCO <sub>3</sub> F                                                                                                | 0.171         | 4.61          | 7         |
| 8  | Na <sub>3</sub> Rb <sub>6</sub> (CO <sub>3</sub> ) <sub>3</sub> (NO <sub>3</sub> ) <sub>2</sub> Cl·6H <sub>2</sub> O | 0.166         | 4.90          | This work |
| 9  | Na <sub>3</sub> Rb <sub>6</sub> (CO <sub>3</sub> ) <sub>3</sub> (NO <sub>3</sub> ) <sub>2</sub> Br·6H <sub>2</sub> O | 0.165         | 4.80          | This work |
| 10 | Cs <sub>2</sub> Pb(NO <sub>3</sub> ) <sub>2</sub> Br <sub>2</sub>                                                    | 0.147         | 3.01          | 8         |
| 11 | LiZn(OH)CO <sub>3</sub>                                                                                              | 0.147         | 6.53          | 9         |
| 12 | Na <sub>4</sub> Zn(CO <sub>3</sub> ) <sub>3</sub>                                                                    | 0.138         | 4.06          | 7         |
| 13 | RbMgCO <sub>3</sub> F                                                                                                | 0.129         | 6.75          | 10        |
| 14 | RbCdCO <sub>3</sub> F                                                                                                | 0.121         | 5.35          | 11        |
| 15 | Sr <sub>3</sub> [SnOSe <sub>3</sub> ][CO <sub>3</sub> ]                                                              | 0.12          | 3.46          | 12        |
| 16 | RbCaCO <sub>3</sub> F                                                                                                | 0.115         | 6.22          | 13        |
| 17 | NaZnCO <sub>3</sub> (OH)                                                                                             | 0.114         | 6.02          | 14        |
| 18 | LiKCO <sub>3</sub>                                                                                                   | 0.11          | 6.32          | 15        |
| 19 | KCdCO <sub>3</sub> F                                                                                                 | 0.11          | 5.46          | 16        |
| 20 | Cs <sub>3</sub> VO(O <sub>2</sub> ) <sub>2</sub> CO <sub>3</sub>                                                     | 0.105         | 2.81          | 17        |
| 21 | KY(CO <sub>3</sub> ) <sub>2</sub>                                                                                    | 0.105         | 6.22          | 18        |
| 22 | Lu <sub>8</sub> O(CO <sub>3</sub> ) <sub>3</sub> (OH) <sub>15</sub> Br                                               | 0.088         | 4.38          | 19        |
| 23 | Zn(NH <sub>3</sub> )CO <sub>3</sub>                                                                                  | 0.087         | 6.08          | 20        |
| 24 | Na <sub>2</sub> Gd(CO <sub>3</sub> )F <sub>3</sub>                                                                   | 0.084         | 6.22          | 21        |
| 25 | Ca <sub>2</sub> Na <sub>3</sub> (CO <sub>3</sub> ) <sub>3</sub> F                                                    | 0.082         | 6.52          | 22        |
| 26 | Ba <sub>2</sub> NO <sub>3</sub> (OH) <sub>3</sub>                                                                    | 0.08          | 6.52          | 23        |
| 27 | Ba <sub>3</sub> (BO <sub>3</sub> )(CO <sub>3</sub> )F                                                                | 0.048         | 5.88          | 24        |
| 28 | (NH <sub>4</sub> ) <sub>2</sub> Ca <sub>2</sub> Y <sub>4</sub> (CO <sub>3</sub> ) <sub>9</sub> ·H <sub>2</sub> O     | 0.04          | 6.22          | 18        |
| 29 | Cs <sub>3</sub> B <sub>8</sub> O <sub>13</sub> (NO <sub>3</sub> )                                                    | 0.036         | 6.13          | 25        |
| 30 | Ba <sub>2</sub> B <sub>5</sub> O <sub>8</sub> (OH) <sub>2</sub> (NO <sub>3</sub> )·3H <sub>2</sub> O                 | 0.033         | 5.06          | 26        |
| 31 | Na <sub>10</sub> Cd(NO <sub>3</sub> ) <sub>4</sub> (SO <sub>3</sub> S) <sub>4</sub>                                  | 0.01          | 3.74          | 27        |



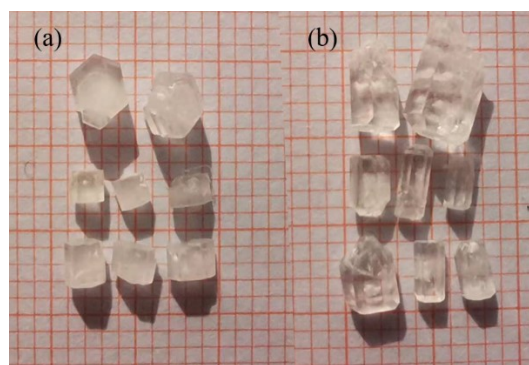

**Figure S1.** The photos of (a)  $\text{Na}_3\text{Rb}_6(\text{CO}_3)_3(\text{NO}_3)_2\text{Br}\cdot 6\text{H}_2\text{O}$  and (b)  $\text{Na}_3\text{Rb}_6(\text{CO}_3)_3(\text{NO}_3)_2\text{Cl}\cdot 6\text{H}_2\text{O}$  crystals (the minimum scale is 1 mm).

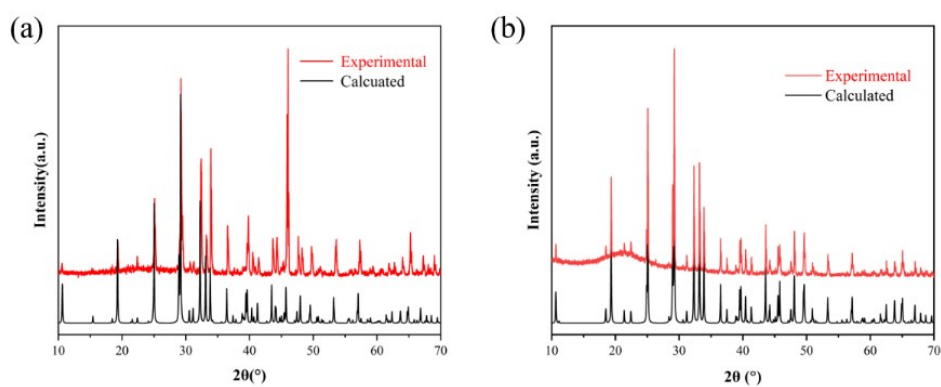

**Figure S2.** Experimental and theoretical PXRD patterns of (a)  $\text{Na}_3\text{Rb}_6(\text{CO}_3)_3(\text{NO}_3)_2\text{Br}\cdot 6\text{H}_2\text{O}$  and (b)  $\text{Na}_3\text{Rb}_6(\text{CO}_3)_3(\text{NO}_3)_2\text{Cl}\cdot 6\text{H}_2\text{O}$ .

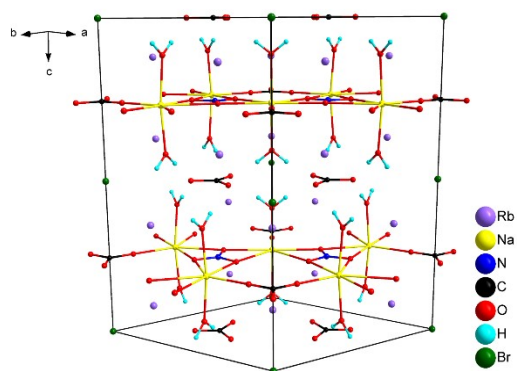

**Figure S3.** The unit cell of  $\text{Na}_3\text{Rb}_6(\text{CO}_3)_3(\text{NO}_3)_2\text{Br}\cdot 6\text{H}_2\text{O}$ .

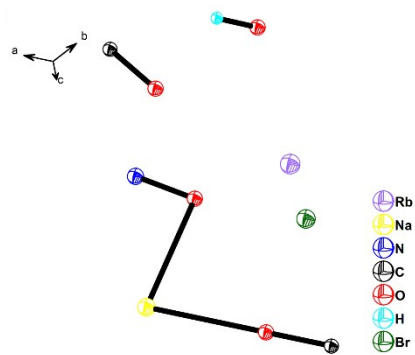

Figure S4. The asymmetric unit  $\text{Na}_3\text{Rb}_6(\text{CO}_3)_3(\text{NO}_3)_2\text{Br}\cdot 6\text{H}_2\text{O}$ .

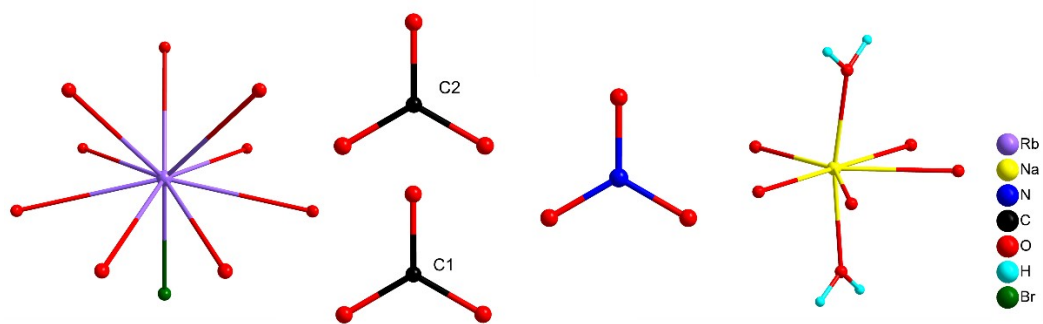

Figure S5. Coordination environments of cations in  $\text{Na}_3\text{Rb}_6(\text{CO}_3)_3(\text{NO}_3)_2\text{Br}\cdot 6\text{H}_2\text{O}$ .

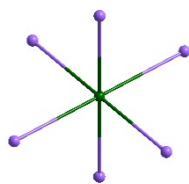

Figure S6. A  $[\text{BrRb}_6]^{5+}$  polyhedron in  $\text{Na}_3\text{Rb}_6(\text{CO}_3)_3(\text{NO}_3)_2\text{Br}\cdot 6\text{H}_2\text{O}$ .

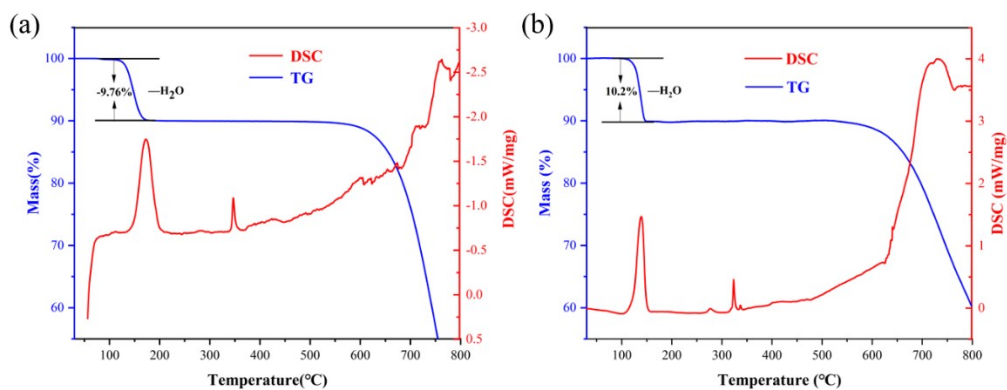

Figure S7. TG-DSC curves of (a)  $\text{Na}_3\text{Rb}_6(\text{CO}_3)_3(\text{NO}_3)_2\text{Br}\cdot 6\text{H}_2\text{O}$  and (b)  $\text{Na}_3\text{Rb}_6(\text{CO}_3)_3(\text{NO}_3)_2\text{Cl}\cdot 6\text{H}_2\text{O}$ .

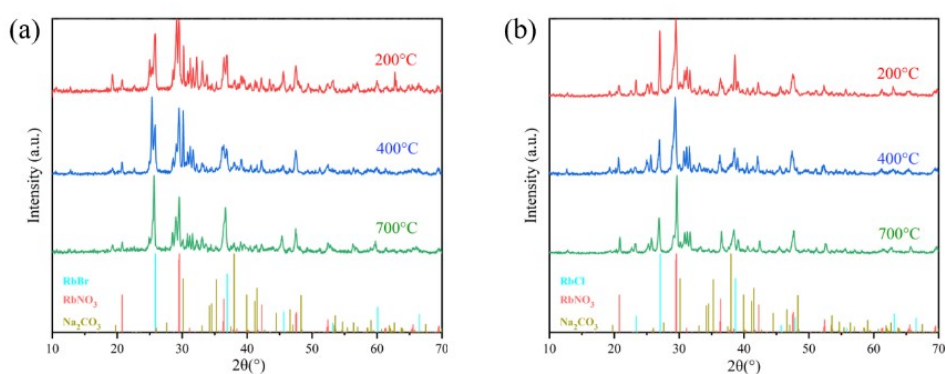

Figure S8. PXRD patterns of residues after decomposition for (a)  $\text{Na}_3\text{Rb}_6(\text{CO}_3)_3(\text{NO}_3)_2\text{Br}\cdot 6\text{H}_2\text{O}$  and (b)  $\text{Na}_3\text{Rb}_6(\text{CO}_3)_3(\text{NO}_3)_2\text{Cl}\cdot 6\text{H}_2\text{O}$ .

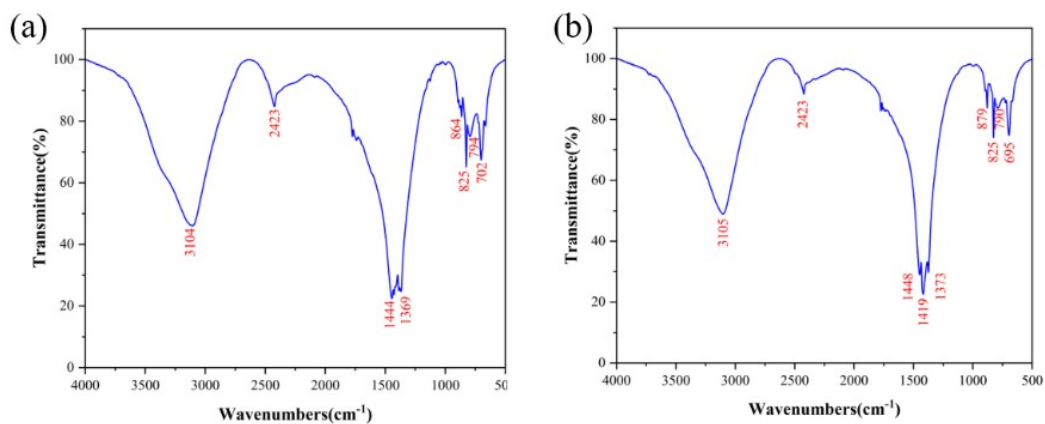

Figure S9. IR spectra of (a)  $\text{Na}_3\text{Rb}_6(\text{CO}_3)_3(\text{NO}_3)_2\text{Br}\cdot 6\text{H}_2\text{O}$  and (b)  $\text{Na}_3\text{Rb}_6(\text{CO}_3)_3(\text{NO}_3)_2\text{Cl}\cdot 6\text{H}_2\text{O}$ .

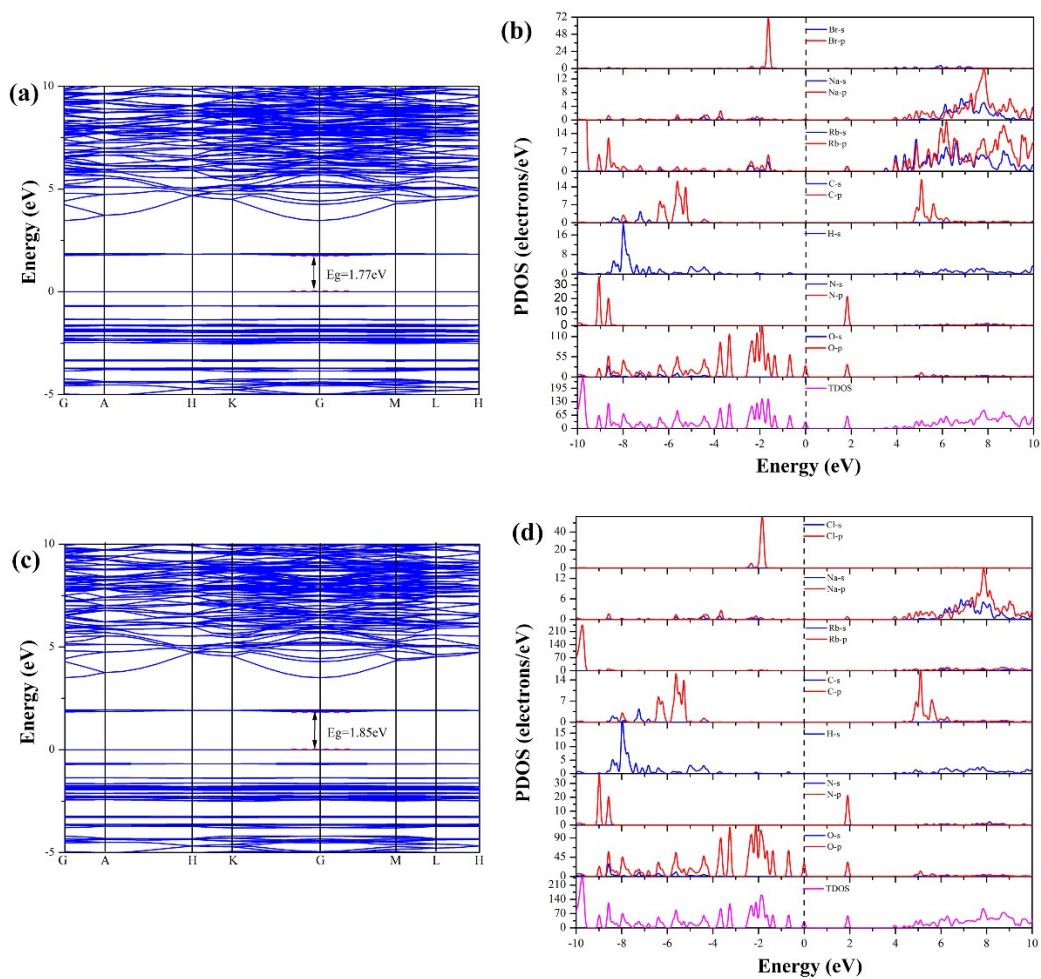

Figure S10. The calculated band gaps and PDOS plots for (a, b)  $\text{Na}_3\text{Rb}_6(\text{CO}_3)_3(\text{NO}_3)_2\text{Br}\cdot 6\text{H}_2\text{O}$  and (c, d)  $\text{Na}_3\text{Rb}_6(\text{CO}_3)_3(\text{NO}_3)_2\text{Cl}\cdot 6\text{H}_2\text{O}$ .

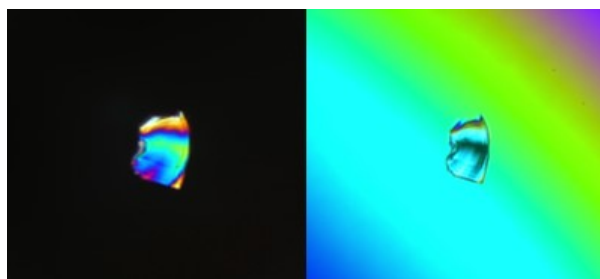

Figure S11. The selected crystal before and after compensatory rotation for birefringence test.

## References

1. S. Bai, D. Yang, B. Zhang, L. Li and Y. Wang, *Dalton Trans.*, 2022, **51**, 3421-3425.
2. T. T. Tran and P. S. Halasyamani, *Inorg. Chem.*, 2013, **52**, 2466-2473.
3. Y. Huang, T. Jiang, B. Yang, C. Hu, Z. Fang and J. Mao, *Inorg. Chem.*, 2022, **61**, 3374-3378.
4. Y. Song, M. Luo, C. Lin and N. Ye, *Chem. Mater.*, 2017, **29**, 896-903.
5. T. T. Tran, P. S. Halasyamani and J. M. Rondinelli, *Inorg. Chem.*, 2014, **53**, 6241-6251.
6. J. Song, C. Hu, X. Xu, F. Kong and J. Mao, *Angew. Chem. Int. Ed.*, 2015, **127**, 3750-3753.
7. G. Peng, Y. Tang, C. Lin, D. Zhao, M. Luo, T. Yan, Y. Chen and N. Ye, *J. Mater. Chem. C*, 2018, **6**, 6526-6533.
8. Y. Long, X. Dong, H. Zeng, Z. Lin and G. Zou, *Inorg. Chem.*, 2022, **61**, 4184-4192.
9. X. Liu, L. Kang, P. Gong and Z. Lin, *Angew. Chem. Int. Ed.*, 2021, **60**, 13574-13578.
10. T. T. Tran, J. He, J. M. Rondinelli and P. S. Halasyamani, *J. Am. Chem. Soc.*, 2015, **137**, 10504-10507.
11. G. Zou, G. Nam, H. G. Kim, H. Jo, T. S. You and K. M. Ok, *RSC Adv.*, 2015, **5**, 84754-84761.
12. J. Wang, Y. Cheng, H. Wu, Z. Hu, J. Wang, Y. Wu and H. Yu, *Angew. Chem. Int. Ed.*, 2022, **134**, e202201616.
13. G. Zou, N. Ye, L. Huang and X. Lin, *J. Am. Chem. Soc.*, 2011, **133**, 20001-20007.
14. G. Peng, C. Lin and N. Ye, *J. Am. Chem. Soc.*, 2020, **142**, 20542-20546.
15. Q. Liu, Z. Li, Y. Wang, X. Su, Z. Yang and S. Pan, *Dalton Trans.*, 2017, **46**, 6894-6899.
16. Y. Lin, C. Hu and J. Mao, *Inorg. Chem.*, 2015, **54**, 10407-10414.
17. G. Zou, Z. Lin, H. Zeng, H. Jo, S. J. Lim, T. S. You and K. M. Ok, *Chem. Sci.*, 2018, **9**, 8957-8961.
18. G. Peng, C. Lin, Y. Yang, D. Zhao, Z. Lin, N. Ye and J. Huang, *Chem. Mater.*, 2018, **31**, 52-56.
19. L. Cao, Y. Song, G. Peng, M. Luo, Y. Yang, C. Lin, D. Zhao, F. Xu, Z. Lin and N. Ye, *Chem. Mater.*, 2019, **31**, 2130-2137.
20. H. Tang, Q. Shui, R. Fu, Z. Zhou, W. Bao, Z. Ma and X. Wu, *J. Mater. Chem. C*, 2021, **9**, 16477-16484.
21. L. Cao, G. Peng, T. Yan, M. Luo, C. Lin and N. Ye, *J. Alloys Compd.*, 2018, **742**, 587-593.
22. M. Luo, Y. Song, C. Lin, N. Ye, W. Cheng and X. Long, *Chem. Mater.*, 2016, **28**, 2301-2307.
23. X. Dong, L. Huang, Q. Liu, H. Zeng, Z. Lin, D. Xu and G. Zou, *Chem. Commun.*, 2018, **54**, 5792-5795.
24. C. Huang, F. Zhang, S. Cheng, Z. Yang, H. Li and S. Pan, *Chem. Eur. J.*, 2020, **26**, 16628-16632.
25. Z. Chen, C. Wu, H. Zeng and F. Yu, *Dalton Trans.*, 2021, **50**, 8676-8679.
26. H. Hu, J. Huang, Z. Guo, M. Zhang, Z. Yang and S. Pan, *Dalton Trans.*, 2022, **51**, 1979-1984.
27. Y. Liu, Y. Liu, Z. Lin, Y. Li, Q. Ding, X. Chen, L. Li, S. Zhao, M. Hong and J. Luo, *CCS Chem.*, 2021, **3**, 694-699.
